# Supplementary material
Source: PubMed Central journal article supplement (PMC4253648)
Supplement: NIHMS602947-supplement-01.pdf [file NIHMS602947-supplement-01.pdf]

## SUPPLEMENTARY MATERIALS

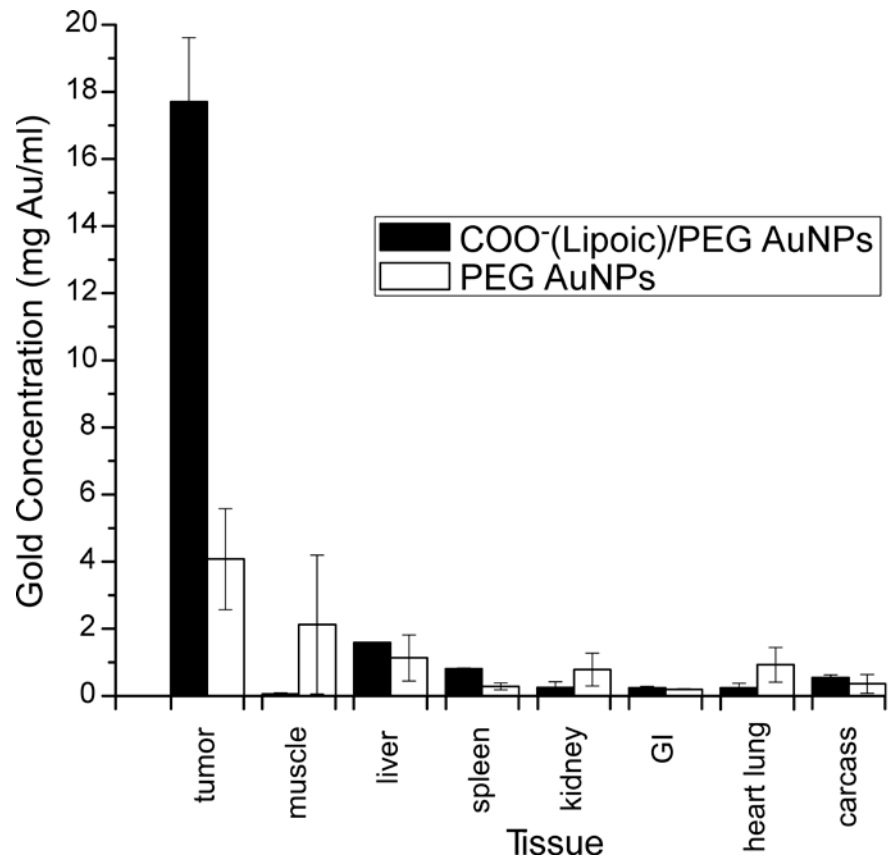

Supplemental Figure 1. Biodistribution of gold 24 hours after direct intratumoral infusion of either lipoic acid AuNPs or PEG AuNPs. Muscle sample was taken from the contralateral leg not bearing the tumor, far away from the tumor and injected AuNPs.
